# Supplementary material for: Enhancing Efficiency of Natural Product Structure Revision: Leveraging CASE and DFT over Total Synthesis
Source: MDPI journal article supplement (doi:10.3390/molecules28093796), 2023-04-28
Supplement: s1 [file s1]

# Supplementary Materials

## Enhancing Efficiency of Natural Product Structure Revision: Leveraging CASE and DFT over Total Synthesis

Mikhail Elyashberg <sup>1,\*</sup>, Sriram Tyagarajan <sup>2</sup>, Mihir Mandal <sup>2</sup>, and Alexei V. Buevich <sup>3,\*</sup>

<sup>1</sup> Advanced Chemistry Development Inc. (ACD/Labs), Toronto, ON, M5C 1B5 Canada; mikhail.elyashberg@acdlabs.com

<sup>2</sup> Medicinal Chemistry, Merck & Co., Inc., Kenilworth, New Jersey 07033, United States; alexei.buevich@merck.com

<sup>3</sup> Analytical Research and Development, Merck & Co., Inc., Kenilworth, New Jersey 07033, United States; alexei.buevich@merck.com

\*Correspondence: mikhail.elyashberg@acdlabs.com, alexei.buevich@merck.com

### Contents

|                                                                                                                                                                  |    |
|------------------------------------------------------------------------------------------------------------------------------------------------------------------|----|
| <b>Table S1.</b> NMR spectroscopic data of Macahydantoin B [1] .....                                                                                             | 3  |
| <b>Table S2.</b> NMR spectroscopic data of clionastatin B [2] .....                                                                                              | 4  |
| <b>Figure S1.</b> MCD for clionastatin B. ....                                                                                                                   | 5  |
| <b>Table S3.</b> NMR spectroscopic data of pyrostatin B [3] .....                                                                                                | 6  |
| <b>Figure S2.</b> MCD for pyrostatin B .....                                                                                                                     | 6  |
| <b>Table S4.</b> NMR spectroscopic data of madurastatin [4] .....                                                                                                | 7  |
| <b>Figure S3.</b> MCD for madurastatin. ....                                                                                                                     | 8  |
| <b>Table S5.</b> NMR spectroscopic data of dichomitol [5] .....                                                                                                  | 9  |
| <b>Figure S4.</b> MCD for dichomitol .....                                                                                                                       | 9  |
| <b>Table S6.</b> NMR spectroscopic data of samoquasine A [6] .....                                                                                               | 10 |
| <b>Figure S5.</b> MCD for samoquasine A .....                                                                                                                    | 10 |
| <b>Table S7.</b> Spectroscopic data of palmarumycin B6 [7] .....                                                                                                 | 11 |
| <b>Figure S6.</b> MCD for palmarumycin B6 .....                                                                                                                  | 11 |
| <b>Table S8.</b> NMR spectroscopic data of nocarbenzoxazole G [8] .....                                                                                          | 12 |
| <b>Figure S7.</b> MCD for nocarbenzoxazole G .....                                                                                                               | 12 |
| <b>Table S9.</b> NMR spectroscopic data of hetiamacin A [9] .....                                                                                                | 13 |
| <b>Figure S8.</b> MCD for hetiamacin A .....                                                                                                                     | 14 |
| <b>Table S10.</b> NMR spectroscopic data of uniflorin [10] .....                                                                                                 | 15 |
| <b>Figure S9.</b> MCD for uniflorin .....                                                                                                                        | 15 |
| <b>Table S11.</b> NMR spectroscopic data of altechromone A [11] .....                                                                                            | 16 |
| <b>Figure S10.</b> MCD for altechromone A .....                                                                                                                  | 16 |
| <b>Table S12.</b> NMR spectroscopic data of aruncin B [12] .....                                                                                                 | 17 |
| <b>Figure S11.</b> MCD for aruncin B .....                                                                                                                       | 17 |
| <b>Figure S12.</b> Sixteen possible diastereomers of dichomitol with fixed R-chirality at the C11 carbon. Natural diastereomer of dichomitol is <b>15a</b> ..... | 18 |

|                                                                                                                                                                                                                   |    |
|-------------------------------------------------------------------------------------------------------------------------------------------------------------------------------------------------------------------|----|
| <b>Table S13.</b> Experimental [5] and DFT-calculated $^1\text{H}$ NMR chemical shifts for sixteen possible diastereomers of dichomitol. Natural diastereomer of dichomitol is <b>15a<sup>a</sup></b> .....       | 19 |
| <b>Table S14.</b> Experimental [5] and DFT-calculated $^{13}\text{C}$ NMR chemical shifts for sixteen possible diastereomers of dichomitol. Natural diastereomer of dichomitol is <b>15a<sup>a</sup></b> .....    | 20 |
| <b>Table S15.</b> Experimental [7] and DFT-calculated $^{13}\text{C}$ NMR chemical shifts of the top six CASE-generated structures for palmarumycin B6 .....                                                      | 22 |
| <b>Table S16.</b> Experimental [8] and DFT-calculated $^{13}\text{C}$ NMR chemical shifts for the top four CASE-generated structures and originally proposed structure for norcarbenzoxazole G <sup>a</sup> ..... | 23 |
| <b>Table S17.</b> Experimental [9] and DFT-calculated $^{13}\text{C}$ NMR chemical shifts of the top three CASE-generated structures and originally proposed structure for hetiamacin A <sup>a</sup> .....        | 24 |
| <b>Table S18.</b> Summary of proposed and revised structures .....                                                                                                                                                | 25 |
| References.....                                                                                                                                                                                                   | 27 |

**Table S1.** NMR spectroscopic data of Macahydantoin B [1]

| Label | $\delta$ C | XHn             | $\delta$ H | COSY          | H to C HMBC          |
|-------|------------|-----------------|------------|---------------|----------------------|
| C 1   | 188.2      | C               |            |               |                      |
| C 2   | 175.6      | C               |            |               |                      |
| C 3   | 74.8       | C               |            |               |                      |
| C 4   | 27.8       | CH <sub>2</sub> | 1.98       | 2.13          | C 3                  |
| C 4   | 27.8       | CH <sub>2</sub> | 1.89       |               |                      |
| C 5   | 25.4       | CH <sub>2</sub> | 2.13       | 1.98,<br>4.21 |                      |
| C 6   | 48.6       | CH <sub>2</sub> | 3.53       |               |                      |
| C 6   | 48.6       | CH <sub>2</sub> | 4.21       | 2.13          | C 3                  |
| C 7   | 63.9       | CH <sub>2</sub> | 3.91       |               |                      |
| C 7   | 63.9       | CH <sub>2</sub> | 3.7        |               | C 3, C 2             |
| C 8   | 45.2       | CH <sub>2</sub> | 5          |               | C 10, C 14, C 2, C 1 |
| C 8   | 45.2       | CH <sub>2</sub> | 4.95, 5.0  |               |                      |
| C 9   | 137        | C               |            |               |                      |
| C 10  | 113.5      | CH              | 6.95       |               | C 12, C 14           |
| C 11  | 159.6      | C               |            |               |                      |
| C 12  | 113.4      | CH              | 6.79       | 7.21          |                      |
| C 13  | 129.5      | CH              | 7.21       | 6.79,<br>7.00 | C 9, C 11            |
| C 14  | 120.3      | CH              | 7          | 7.21          |                      |
| C 15  | 55.2       | CH <sub>3</sub> | 3.77       |               | C 11                 |

**Table S2.** NMR spectroscopic data of clionastatin B [2]

| Label | $\delta C$ | CHn             | $\delta H$ | M | COSY       | H to C HMBC                        |
|-------|------------|-----------------|------------|---|------------|------------------------------------|
| C 1   | 67.5       | CH              | 4.2        | d | 4.71       | C 19, C 2, C 4, C 3                |
| C 2   | 61.3       | CH              | 4.71       | u | 4.20, 6.06 | C 10, C 1, C 4, C 3                |
| C 3   | 132.8      | CH              | 6.06       | u | 4.71, 6.46 | C 2, C 1, C 4, C 5                 |
| C 4   | 128.6      | CH              | 6.46       | d | 6.06       | C 10, C 2, C 6, C 3                |
| C 5   | 149.3      | C               |            |   |            |                                    |
| C 6   | 130.1      | CH              | 6.53       | s |            | C 10, C 4, C 8, C 5, C 7           |
| C 7   | 181.6      | C               |            |   |            |                                    |
| C 8   | 138.5      | C               |            |   |            |                                    |
| C 9   | 154.9      | C               |            |   |            |                                    |
| C 10  | 52.3       | C               |            |   |            |                                    |
| C 11  | 27.3       | CH <sub>2</sub> | 2.08       | u |            |                                    |
| C 11  | 27.3       | CH <sub>2</sub> | 2.69       | u |            | C 12, C 10, C 8, C 9               |
| C 12  | 35         | CH <sub>2</sub> | 1.92       | u |            | C 18, C 11, C 13, C 14             |
| C 12  | 35         | CH <sub>2</sub> | 1.48       | u |            |                                    |
| C 13  | 45.5       | C               |            |   |            |                                    |
| C 14  | 50.1       | CH              | 3.99       | s |            | C 18, C 13, C 16, C 8,<br>C 9, C 7 |
| C 15  | 205.9      | C               |            |   |            |                                    |
| C 16  | 134        | CH              | 6.31       | d | 7.4        | C 13, C 14, C 15                   |
| C 17  | 170.5      | CH              | 7.4        | d | 6.31       | C 18, C 13, C 15                   |
| C 18  | 27         | CH <sub>3</sub> | 1.32       | s |            | C 12, C 14, C 17                   |
| C 19  | 43.6       | CH <sub>2</sub> | 3.76       | u |            | C 10, C 1, C 5, C 9                |
| C 19  | 43.6       | CH <sub>2</sub> | 4.24       | u |            |                                    |

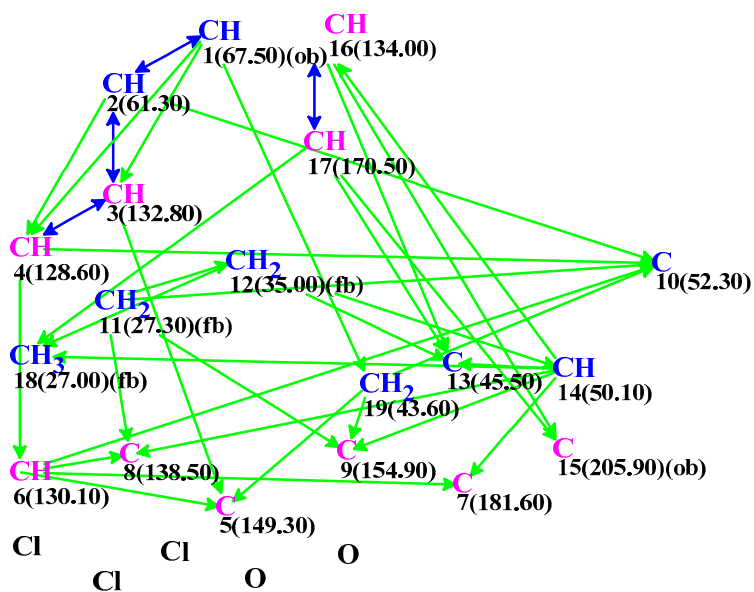

**Figure S1.** MCD for clionastatin B. Molecular connectivity diagram (MCD) for clionastatin B is based on COSY (blue arrows) and HMBC (green arrows) correlations. The hybridizations of carbon atoms are marked by corresponding colors: sp<sup>2</sup>—violet, sp<sup>3</sup>—blue. Labels “ob” and “fb” are set by the program to carbon atoms, for which neighboring with heteroatom is either obligatory (ob) or forbidden (fb).

**Table S3.** NMR spectroscopic data of pyrostatin B [3]

| Label | $\delta\text{C}$ | XHn             | $\delta\text{H}$ | H to C HMBC           |
|-------|------------------|-----------------|------------------|-----------------------|
| C 2   | 161.2            | C               |                  |                       |
| C 3   | 38               | CH <sub>2</sub> | 3.46             |                       |
| C 3   | 38               | CH <sub>2</sub> | 3.3              | C 4, C 5, C 2         |
| C 4   | 22.1             | CH <sub>2</sub> | 2.1              | C 3, C 5, C 7         |
| C 5   | 53.9             | CH              | 4.07             | C 4, C 3, C 2,<br>C 7 |
| C 6   | 18.9             | CH <sub>3</sub> | 2.24             | C 2                   |
| C 7   | 177.4            | C               |                  |                       |

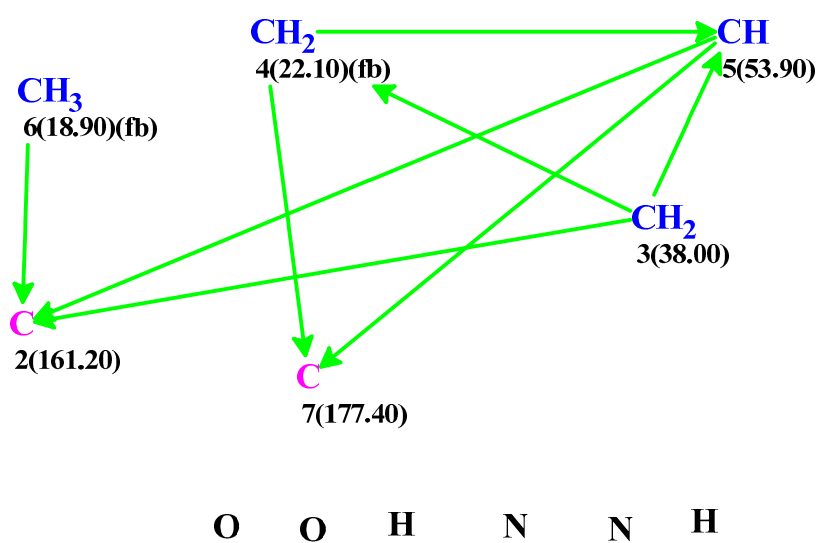

**Figure S2.** MCD for pyrostatin B

**Table S4.** NMR spectroscopic data of madurastatin [4]

| C/X Label | $\delta C$ | XHn             | $\delta H$ | M | COSY          | H to C HMBC    |
|-----------|------------|-----------------|------------|---|---------------|----------------|
| C 1       | 159.1      | C               |            |   |               |                |
| C 2       | 116.6      | CH              | 7.01       | u | 7.47          | C 6            |
| C 3       | 134.1      | CH              | 7.47       | u | 6.95,<br>7.01 | C 1            |
| C 4       | 119.1      | CH              | 6.95       | u | 7.47,<br>7.65 |                |
| C 5       | 128.1      | CH              | 7.65       | u | 6.95          | C 1, C 7       |
| C 6       | 109.9      | C               |            |   |               |                |
| C 7       | 165.9      | C               |            |   |               |                |
| C 9       | 67.4       | CH              | 5.01       | u | 4.65          | C 7            |
| C 10      | 69.4       | CH <sub>2</sub> | 4.65       | u | 5.01          | C 7, C 11      |
| C 10      | 69.4       | CH <sub>2</sub> | 4.52       | u |               |                |
| C 11      | 170.2      | C               |            |   |               |                |
| C 13      | 42.2       | CH <sub>2</sub> | 3.67       | u |               |                |
| C 13      | 42.2       | CH <sub>2</sub> | 3.75       | u | 8.52          |                |
| C 14      | 168.4      | C               |            |   |               |                |
| C 16      | 34.6       | CH <sub>2</sub> | 3.25       | u | 2.52,<br>7.93 |                |
| C 17      | 32         | CH <sub>2</sub> | 2.52       | u | 3.25          | C 18           |
| C 18      | 170.9      | C               |            |   |               |                |
| C 20      | 47         | CH <sub>2</sub> | 3.47       | u | 1.58          | C 18           |
| C 21      | 22.8       | CH <sub>2</sub> | 1.58       | u | 1.47,<br>3.47 |                |
| C 22      | 30.2       | CH <sub>2</sub> | 1.47       | u | 1.58,<br>2.87 |                |
| C 22      | 30.2       | CH <sub>2</sub> | 1.4        | u |               |                |
| C 23      | 63.7       | CH              | 2.87       | u | 1.47          | C 26           |
| C 25      | 34.2       | CH <sub>3</sub> | 2.21       | u |               | C 23           |
| C 26      | 173.5      | C               |            |   |               |                |
| C 28      | 49.4       | CH              | 4.32       | u | 1.67,<br>8.11 |                |
| C 29      | 27.8       | CH <sub>2</sub> | 1.67       | u | 1.90,<br>4.32 |                |
| C 29      | 27.8       | CH <sub>2</sub> | 1.89       | u |               |                |
| C 30      | 20.4       | CH <sub>2</sub> | 1.9        | u | 1.67,<br>3.46 |                |
| C 31      | 51.2       | CH <sub>2</sub> | 3.46       | u | 1.9           | 165            |
| C 33      | 165        | C               |            |   |               |                |
| N 1       |            | N               |            |   |               |                |
| N 2       |            | NH              | 8.52       | u | 3.75          | 168.40, 170.20 |
| N 3       |            | NH              | 7.93       | u | 3.25          | 168.4          |
| N 4       |            | N               |            |   |               |                |
| N 5       |            | NH              |            |   |               |                |
| N 6       |            | NH              | 8.11       | u | 4.32          | 165.00, 173.50 |
| N 7       |            | N               |            |   |               |                |

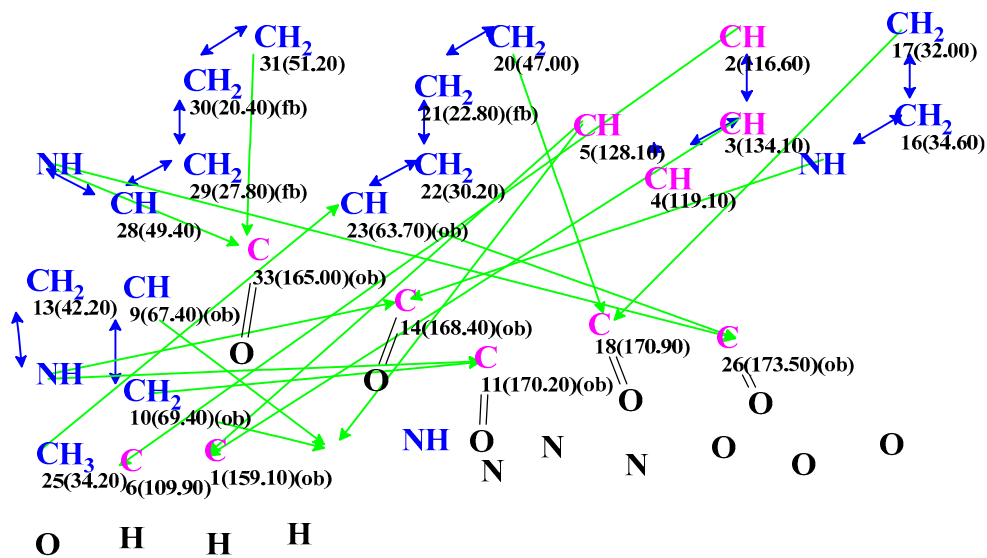

Figure S3. MCD for madurastatin.



**Table S5.** NMR spectroscopic data of dichomitol [5]

| Label | $\delta C$ | XHn             | $\delta H$ | C to H HMBC                      |
|-------|------------|-----------------|------------|----------------------------------|
| C 1   | 36         | CH <sub>2</sub> | 1.44       |                                  |
| C 1   | 36         | CH <sub>2</sub> | 1.35       |                                  |
| C 2   | 45.5       | CH              | 2.4        |                                  |
| C 3   | 45.9       | C               |            |                                  |
| C 4   | 36.1       | CH <sub>2</sub> | 1.87       |                                  |
| C 4   | 36.1       | CH <sub>2</sub> | 1.85       |                                  |
| C 5   | 25.1       | CH <sub>2</sub> | 2.64       |                                  |
| C 5   | 25.1       | CH <sub>2</sub> | 2.78       |                                  |
| C 6   | 129.1      | C               |            |                                  |
| C 7   | 145.8      | C               |            |                                  |
| C 8   | 74.3       | CH              | 4.13       | C 10, C 2, C 3, C 9, C 6,<br>C 7 |
| C 9   | 50.5       | CH              | 2.33       |                                  |
| C 10  | 40.8       | CH <sub>2</sub> | 1.73       |                                  |
| C 10  | 40.8       | CH <sub>2</sub> | 1.27       |                                  |
| C 11  | 45.1       | C               |            |                                  |
| C 12  | 72.1       | CH <sub>2</sub> | 3.46       |                                  |
| C 12  | 72.1       | CH <sub>2</sub> | 3.48       | C 1, C 10, C 11                  |
| C 13  | 22.7       | CH <sub>3</sub> | 0.99       | C 1, C 10, C 11                  |
| C 14  | 20.3       | CH <sub>3</sub> | 1.07       | C 4, C 2, C 3, C 7               |
| C 15  | 59         | CH <sub>2</sub> | 4.22       |                                  |
| C 15  | 59         | CH <sub>2</sub> | 4.2        | C 5, C 6, C 7                    |

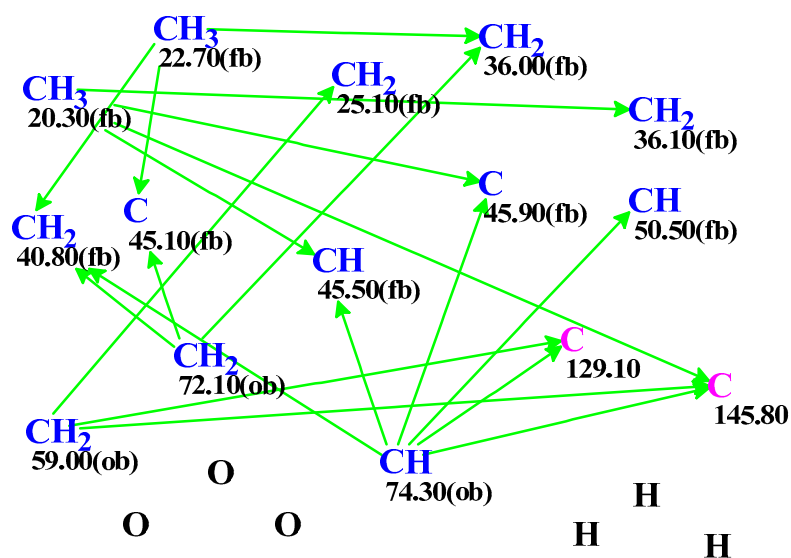

**Figure S4.** MCD for dichomitol

**Table S6.** NMR spectroscopic data of samoquasine A [6]

| Label | $\delta\text{C}$ | XHn | $\delta\text{H}$ | COSY       | H to CHMBC      |
|-------|------------------|-----|------------------|------------|-----------------|
| C 1   | 150.5            | CH  | 9.6              |            | C 3, C 12, C 11 |
| C 2   | 164              | C   |                  |            |                 |
| C 3   | 118.7            | C   |                  |            |                 |
| C 4   | 136              | CH  | 7.55             | 7.3        | C 6, C 12, C 2  |
| C 5   | 101.6            | CH  | 7.3              | 7.55       | C 3, C 4        |
| C 6   | 123.6            | C   |                  |            |                 |
| C 7   | 125              | CH  | 8.4              | 7.71       | C 12, C 11      |
| C 8   | 128.7            | CH  | 7.71             | 7.87, 8.40 | C 6, C 10       |
| C 9   | 132.8            | CH  | 7.87             | 7.71, 8.12 | C 7, C 11       |
| C 10  | 130.4            | CH  | 8.12             | 7.87       | C 6, C 8        |
| C 11  | 148.5            | C   |                  |            |                 |
| C 12  | 144.3            | C   |                  |            |                 |

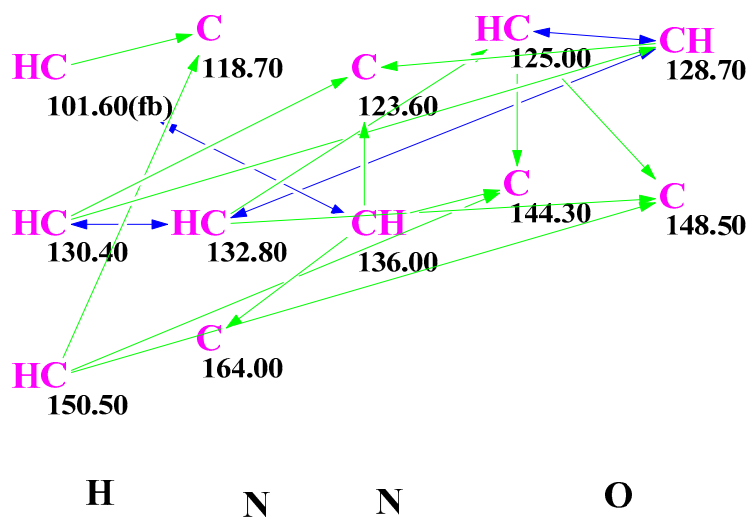

**Figure S5.** MCD for samoquasine A

**Table S7.** Spectroscopic data of palmarumycin B6 [7]

| Label | $\delta\text{C}$ | XHn             | $\delta\text{H}$ |
|-------|------------------|-----------------|------------------|
| C 1   | 116.3            | C               |                  |
| C 2   | 124.2            | C               |                  |
| C 3   | 158.1            | C               |                  |
| C 4   | 139.6            | C               |                  |
| C 5   | 117.2            | CH              | 7.42             |
| C 6   | 137.1            | CH              | 7.7              |
| C 7   | 34.3             | CH <sub>2</sub> | 2.88             |
| C 8   | 29.5             | CH <sub>2</sub> | 2.49             |
| C 9   | 203.4            | C               |                  |
| C 10  | 98.2             | C               |                  |
| C 12  | 147.3            | C               |                  |
| C 13  | 113.4            | C               |                  |
| C 16  | 134.4            | C               |                  |
| C 17  | 121.2            | CH              | 7.54             |
| C 18  | 109.6            | CH              | 6.97             |
| C 19  | 127.7            | CH              | 7.46             |
|       |                  | OH              | 11.846           |

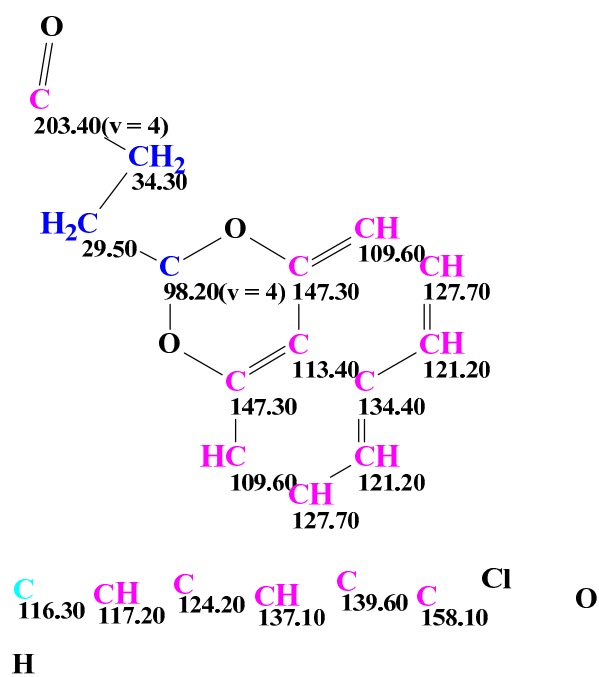

**Figure S6.** MCD for palmarumycin B6

**Table S8.** NMR spectroscopic data of nocarbenzoxazole G [8]

| Label | $\delta$ C | XHn             | $\delta$ H |
|-------|------------|-----------------|------------|
| C 1   | 165.700    | C               |            |
| C 2   | 118.500    | CH              | 7.690      |
| C 3   | 143.200    | C               |            |
| C 4   | 140.200    | C               |            |
| C 5   | 65.200     | CH <sub>2</sub> | 4.730      |
| C 6   | 125.400    | CH              | 7.390      |
| C 7   | 111.400    | CH              | 7.610      |
| C 8   | 151.300    | C               |            |
| C 9   | 119.300    | C               |            |
| C 10  | 149.700    | C               |            |
| C 11  | 111.700    | CH              | 7.770      |
| C 12  | 152.200    | C               |            |
| C 13  | 122.900    | CH              | 7.740      |
| C 14  | 117.000    | CH              | 6.970      |
| C 15  | 56.700     | CH <sub>3</sub> | 3.990      |

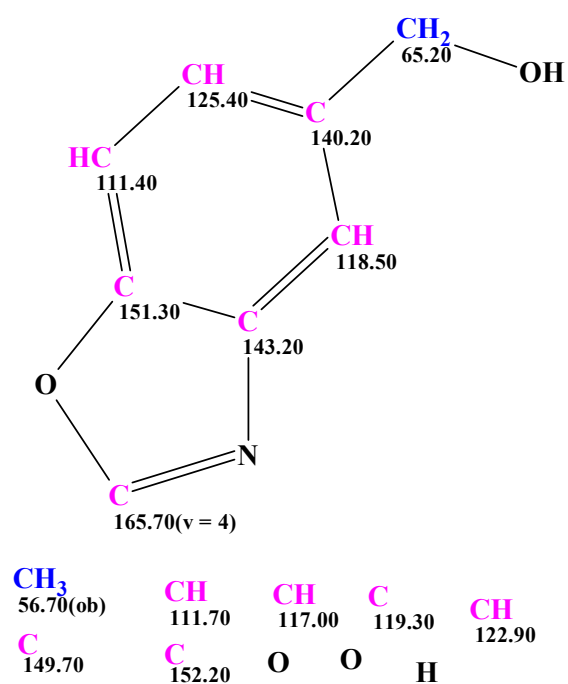

**Figure S7.** MCD for nocarbenzoxazole G

**Table S9.** NMR spectroscopic data of hetiamacin A [9]

| Label | $\delta$ C | XHn             | $\delta$ H | H to C HMBC                  |
|-------|------------|-----------------|------------|------------------------------|
| C 1   | 109.2      | C               |            |                              |
| C 2   | 141.5      | C               |            |                              |
| C 3   | 163.2      | C               |            |                              |
| C 4   | 118.3      | CH              | 6.72       | C 10, C 1, C 5, C 6, C 2     |
| C 5   | 116.5      | CH              | 6.78       | C 1, C 4, C 6, C 3           |
| C 6   | 137.3      | CH              | 7.39       | C 5, C 4, C 2, C 3           |
| C 8   | 82.6       | CH              | 4.6        | C 10, C 12, C 11, C 2, C 9   |
| C 9   | 170.9      | C               |            |                              |
| C 10  | 30.7       | CH <sub>2</sub> | 3.03       | C 11, C 8, C 1, C 4, C 2     |
| C 10  | 30.7       | CH <sub>2</sub> | 2.84       | C 11, C 8, C 1, C 4, C 2     |
| C 11  | 50.1       | CH              | 4.3        | C 13, C 10, C 12, C 8, C 19  |
| C 12  | 40.6       | CH <sub>2</sub> | 1.39       | C 14, C 17, C 13, C 11, C 8  |
| C 12  | 40.6       | CH <sub>2</sub> | 1.76       | C 14, C 17, C 13, C 11, C 8  |
| C 13  | 25.7       | CH              | 1.63       | C 14, C 17, C 12, C 11       |
| C 14  | 21.8       | CH <sub>3</sub> | 0.89       | C 17, C 13, C 12             |
| C 17  | 23.6       | CH <sub>3</sub> | 0.92       | C 14, C 13, C 12             |
| C 19  | 172.8      | C               |            |                              |
| C 21  | 81.2       | CH              | 3.75       | C 23, C 25, C 24, C 19       |
| C 23  | 58.8       | CH              | 2.91       | C 28, C 25, C 24, C 21, C 29 |
| C 24  | 79.2       | CH <sub>2</sub> | 4.5        | C 23, C 21                   |
| C 24  | 79.2       | CH <sub>2</sub> | 4.13       | C 23, C 21                   |
| C 25  | 70.3       | CH              | 3.22       | C 28, C 23, C 21, C 19       |
| C 28  | 38         | CH <sub>2</sub> | 2.26       | C 23, C 25, C 29             |
| C 28  | 38         | CH <sub>2</sub> | 2.22       | C 23, C 25, C 29             |
| C 29  | 176.6      | C               |            |                              |
|       |            | NH <sub>2</sub> | 5.19       |                              |
|       |            | NH <sub>2</sub> | 5.565      |                              |
|       |            | NH              | 11.624     |                              |
|       |            | OH              | 2.706      |                              |
|       |            | OH              | 7.035      |                              |
|       |            | NH              | 11.052     |                              |

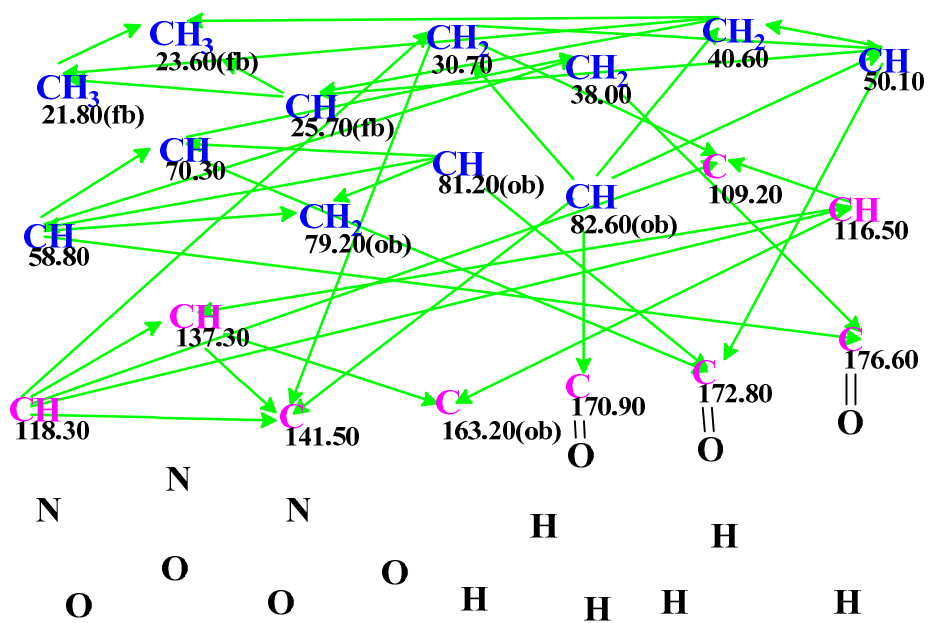

Figure S8. MCD for hetiamacin A

**Table S10.** NMR spectroscopic data of uniflorin [10]

| Label | $\delta C$ | XHn             | $\delta H$ |
|-------|------------|-----------------|------------|
| C 1   | 73.6       | CH              | 3.14       |
| C 3   | 81.2       | CH              | 20         |
| C 4   | 65.3       | CH <sub>2</sub> | 3.76       |
| C 5   | 79.9       | CH              | 3.81       |
| C 6   | 72.5       | CH              | 2.76       |
| C 7   | 78.1       | CH              | 4.18       |
| C 8   | 74.2       | CH              | 4.35       |
| C 9   | 60         | CH <sub>2</sub> | 3.04       |

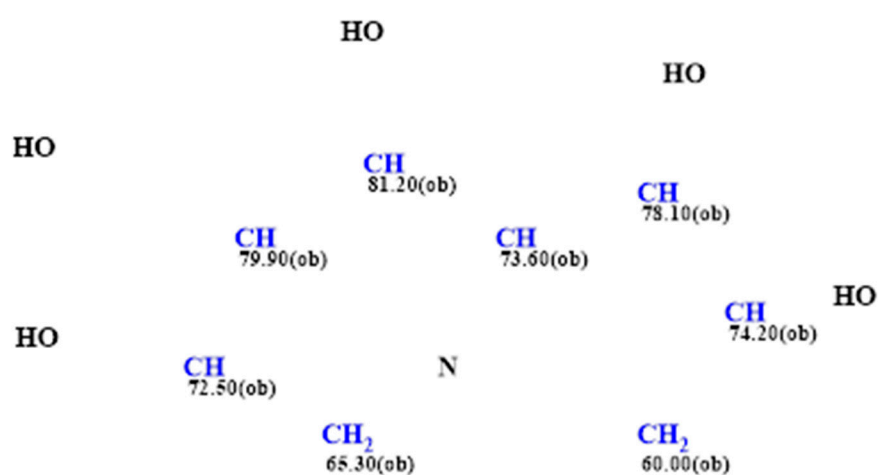

**Figure S9.** MCD for uniflorin

**Table S11.** NMR spectroscopic data of altechromone A [11]

| C Label | C     | CHn             | H     |
|---------|-------|-----------------|-------|
| C 1     | 116.5 | C               |       |
| C 2     | 159.1 | C               |       |
| C 3     | 141.4 | C               |       |
| C 4     | 100.5 | CH              | 6.65  |
| C 5     | 110.7 | CH              | 6.61  |
| C 6     | 160.9 | C               |       |
| C 7     | 114.2 | CH              | 5.96  |
| C 8     | 163.8 | C               |       |
| C 9     | 178.3 | C               |       |
| C 12    | 19.3  | CH <sub>3</sub> | 2.26  |
| C 14    | 22.4  | CH <sub>3</sub> | 2.64  |
|         |       | OH              | 10.55 |

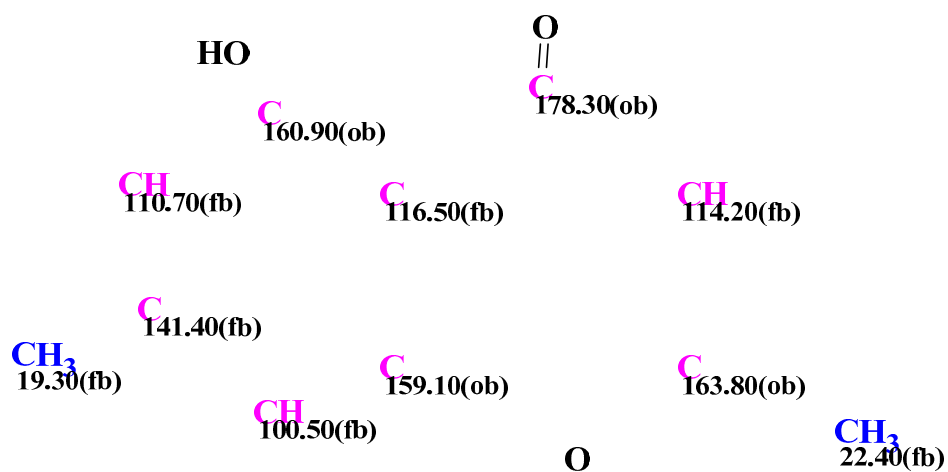

**Figure S10.** MCD for altechromone A



**Table S12.** NMR spectroscopic data of aruncin B [12]

| C Label | $\delta$ C | CHn             | $\delta$ H | M |
|---------|------------|-----------------|------------|---|
| C 2     | 64.2       | CH <sub>2</sub> | 3.64       | u |
| C 2     | 64.2       | CH <sub>2</sub> | 3.76       | u |
| C 3     | 76.8       | CH              | 4.27       | u |
| C 4     | 132.3      | C               |            |   |
| C 5     | 143        | CH              | 7.46       | u |
| C 6     | 147.5      | C               |            |   |
| C 7     | 124.9      | CH              | 5.57       | s |
| C 8     | 71.3       | C               |            |   |
| C 9     | 30.3       | CH <sub>3</sub> | 1.5        | s |
| C 10    | 66.8       | CH <sub>2</sub> | 3.57       | q |
| C 11    | 15.8       | CH <sub>3</sub> | 1.22       | t |
| C 12    | 170.8      | C               |            |   |

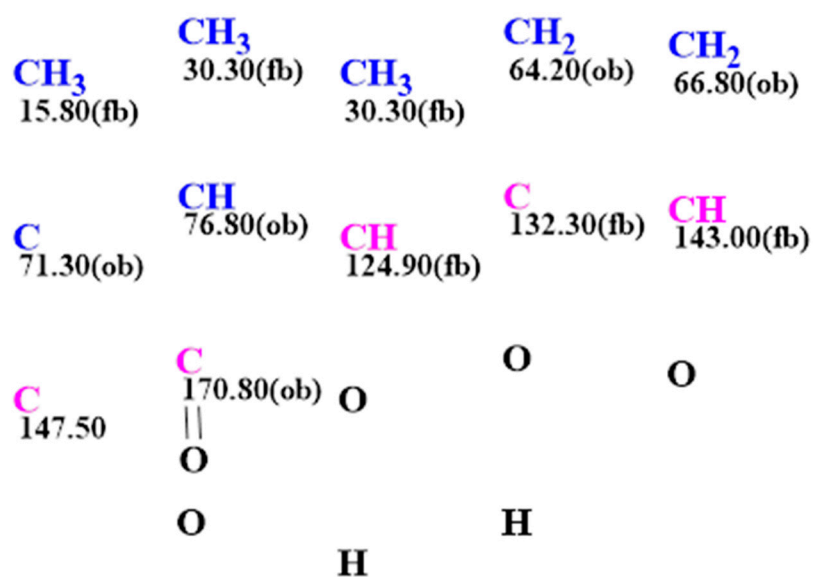

**Figure S11.** MCD for aruncin B

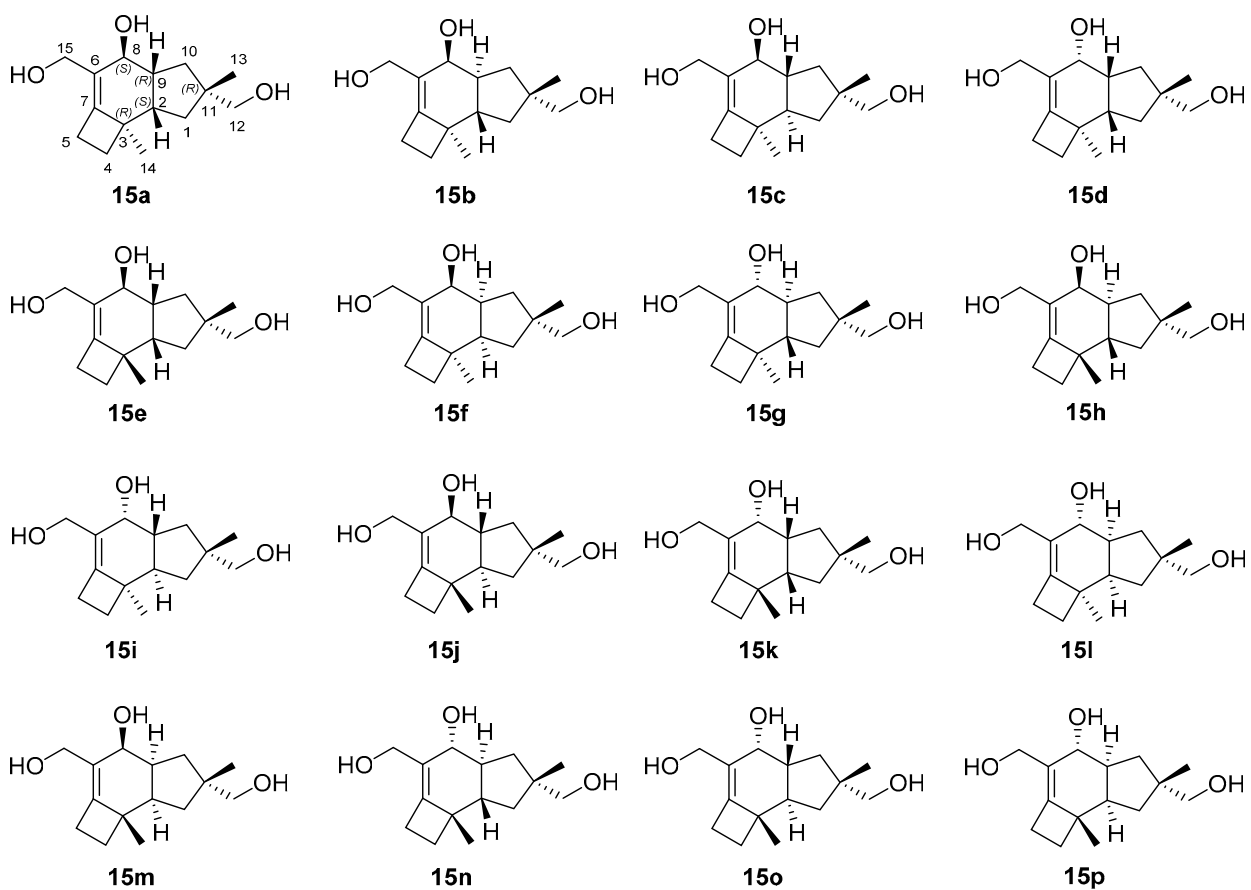

**Figure S12.** Sixteen possible diastereomers of dichomitol with fixed R-chirality at the C11 carbon. Natural diastereomer of dichomitol is **15a**

**Table S13.** Experimental [5] and DFT-calculated  $^1\text{H}$  NMR chemical shifts for sixteen possible diastereomers of dichomitol. Natural diastereomer of dichomitol is **15a**<sup>a</sup>

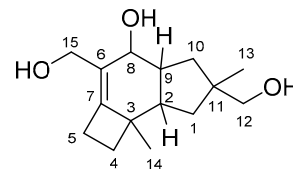

| Protons      | Exper. | <b>15a</b>    | <b>15b</b> | <b>15c</b> | <b>15d</b> | <b>15e</b> | <b>15f</b> | <b>15g</b> | <b>15h</b> |
|--------------|--------|---------------|------------|------------|------------|------------|------------|------------|------------|
| 1a           | 1.35   | 1.24          | 1.20       | 0.88       | 1.23       | 1.09       | 1.14       | 1.18       | 1.21       |
| 1b           | 1.44   | 1.52          | 1.46       | 1.69       | 1.73       | 1.46       | 1.60       | 1.42       | 1.30       |
| 2            | 2.40   | 2.32          | 1.87       | 1.46       | 2.22       | 2.04       | 2.10       | 1.80       | 1.93       |
| 4a           | 1.87   | 1.81          | 1.79       | 1.68       | 1.89       | 1.76       | 1.57       | 1.75       | 1.63       |
| 4b           | 1.85   | 1.74          | 1.64       | 1.45       | 1.66       | 1.58       | 2.01       | 1.57       | 1.46       |
| 5a           | 2.64   | 2.56          | 2.65       | 2.45       | 2.55       | 2.44       | 2.50       | 2.47       | 2.39       |
| 5b           | 2.78   | 2.74          | 2.91       | 2.80       | 2.85       | 2.84       | 2.72       | 2.87       | 2.90       |
| 8            | 4.13   | 4.07          | 4.13       | 4.04       | 4.10       | 4.13       | 4.40       | 4.08       | 4.04       |
| 9            | 2.33   | 2.25          | 1.81       | 1.60       | 2.30       | 2.05       | 2.65       | 1.77       | 1.52       |
| 10a          | 1.27   | 1.28          | 1.51       | 1.23       | 1.33       | 1.51       | 1.58       | 1.00       | 1.27       |
| 10b          | 1.73   | 1.62          | 1.59       | 1.43       | 1.85       | 1.80       | 1.30       | 1.98       | 1.48       |
| 12a          | 3.48   | 3.36          | 3.29       | 3.28       | 3.39       | 3.31       | 3.33       | 3.25       | 3.26       |
| 12b          | 3.46   | 3.35          | 3.27       | 3.26       | 3.32       | 3.29       | 3.29       | 3.21       | 3.23       |
| 13           | 0.99   | 0.96          | 0.96       | 0.98       | 0.95       | 0.96       | 0.99       | 0.96       | 0.99       |
| 14           | 1.07   | 1.02          | 1.08       | 1.19       | 1.29       | 1.32       | 1.12       | 1.17       | 1.30       |
| 15a          | 4.20   | 4.08          | 3.95       | 4.12       | 3.85       | 3.95       | 4.08       | 4.00       | 3.87       |
| 15b          | 4.22   | 4.11          | 4.16       | 4.09       | 4.08       | 4.10       | 4.09       | 4.16       | 4.03       |
| RMSD, ppm    |        | <b>0.086</b>  | 0.225      | 0.357      | 0.157      | 0.198      | 0.223      | 0.258      | 0.305      |
| max_dev, ppm |        | <b>0.12</b>   | 0.53       | 0.94       | 0.35       | 0.36       | 0.43       | 0.60       | 0.81       |
| <i>r</i>     |        | <b>0.9991</b> | 0.9841     | 0.9664     | 0.9922     | 0.9875     | 0.9799     | 0.9813     | 0.9773     |
| <i>n</i>     |        | 292           | 174        | 168        | 228        | 161        | 476        | 181        | 141        |

| Protons      | Exper. | <b>15i</b> | <b>15j</b> | <b>15k</b> | <b>15l</b> | <b>15m</b> | <b>15n</b> | <b>15o</b> | <b>15p</b> |
|--------------|--------|------------|------------|------------|------------|------------|------------|------------|------------|
| 1a           | 1.35   | 0.82       | 1.09       | 0.96       | 1.08       | 1.30       | 1.25       | 1.23       | 1.24       |
| 1b           | 1.44   | 1.70       | 1.57       | 2.05       | 1.53       | 1.59       | 1.28       | 1.59       | 1.59       |
| 2            | 2.40   | 1.83       | 1.73       | 2.01       | 2.03       | 2.19       | 1.52       | 2.49       | 2.26       |
| 4a           | 1.87   | 1.62       | 1.73       | 1.91       | 1.84       | 1.89       | 1.68       | 1.77       | 1.81       |
| 4b           | 1.85   | 1.47       | 1.56       | 1.64       | 1.58       | 1.67       | 1.45       | 1.65       | 1.73       |
| 5a           | 2.64   | 2.40       | 2.47       | 2.55       | 2.46       | 2.57       | 2.44       | 2.63       | 2.55       |
| 5b           | 2.78   | 2.89       | 2.87       | 2.86       | 2.84       | 2.85       | 2.80       | 2.90       | 2.74       |
| 8            | 4.13   | 4.06       | 4.06       | 4.19       | 4.03       | 4.08       | 4.04       | 4.20       | 4.06       |
| 9            | 2.33   | 1.57       | 1.87       | 2.53       | 2.14       | 2.34       | 1.53       | 1.97       | 2.17       |
| 10a          | 1.27   | 1.15       | 1.26       | 1.49       | 1.35       | 1.41       | 0.98       | 1.41       | 1.07       |
| 10b          | 1.73   | 1.44       | 1.71       | 2.34       | 1.74       | 1.76       | 1.74       | 1.88       | 1.91       |
| 12a          | 3.48   | 3.27       | 3.24       | 3.52       | 3.26       | 3.37       | 3.28       | 3.38       | 3.33       |
| 12b          | 3.46   | 3.27       | 3.22       | 3.09       | 3.23       | 3.30       | 3.24       | 3.21       | 3.33       |
| 13           | 0.99   | 0.98       | 0.98       | 0.88       | 1.00       | 1.04       | 0.99       | 0.92       | 1.03       |
| 14           | 1.07   | 1.29       | 1.18       | 1.17       | 1.32       | 1.29       | 1.21       | 1.09       | 1.02       |
| 15a          | 4.20   | 3.87       | 4.00       | 4.02       | 3.92       | 3.85       | 4.07       | 3.94       | 4.08       |
| 15b          | 4.22   | 4.04       | 4.12       | 4.27       | 4.15       | 4.08       | 4.11       | 4.25       | 4.10       |
| RMSD, ppm    |        | 0.334      | 0.252      | 0.286      | 0.192      | 0.147      | 0.335      | 0.159      | 0.122      |
| max_dev, ppm |        | 0.76       | 0.67       | 0.61       | 0.37       | 0.35       | 0.88       | 0.36       | 0.20       |
| <i>r</i>     |        | 0.9711     | 0.9826     | 0.9649     | 0.9897     | 0.9945     | 0.9720     | 0.9900     | 0.9961     |
| <i>n</i>     |        | 141        | 162        | 127        | 467        | 267        | 162        | 162        | 265        |

**Table S14.** Experimental [5] and DFT-calculated  $^{13}\text{C}$  NMR chemical shifts for sixteen possible diastereomers of dichomitol. Natural diastereomer of dichomitol is **15a**<sup>a</sup>

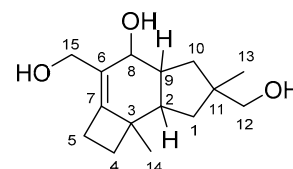

| Carbons      | Exper. | <b>15a</b>    | <b>15b</b> | <b>15c</b> | <b>15d</b> | <b>15e</b> | <b>15f</b> | <b>15g</b> | <b>15h</b> |
|--------------|--------|---------------|------------|------------|------------|------------|------------|------------|------------|
| 1            | 36.0   | 35.3          | 35.0       | 34.8       | 36.5       | 37.0       | 39.8       | 35.6       | 34.6       |
| 2            | 45.5   | 47.4          | 44.6       | 49.6       | 46.1       | 49.7       | 45.6       | 51.7       | 42.0       |
| 3            | 45.9   | 48.3          | 50.3       | 52.1       | 48.3       | 47.7       | 47.8       | 49.8       | 51.6       |
| 4            | 36.1   | 35.3          | 32.1       | 26.4       | 35.4       | 28.4       | 28.4       | 32.5       | 25.3       |
| 5            | 25.1   | 25.3          | 30.4       | 30.3       | 27.1       | 27.8       | 25.6       | 29.0       | 30.6       |
| 6            | 145.8  | 147.1         | 150.9      | 145.9      | 154.5      | 146.8      | 145.3      | 150.5      | 151.7      |
| 7            | 129.1  | 132.3         | 127.9      | 132.1      | 131.7      | 126.9      | 129.7      | 128.6      | 131.8      |
| 8            | 74.3   | 75.1          | 69.9       | 75.6       | 69.6       | 76.1       | 69.6       | 79.1       | 68.8       |
| 9            | 50.5   | 51.5          | 45.5       | 52.2       | 46.6       | 47.9       | 46.3       | 47.5       | 49.5       |
| 10           | 40.8   | 39.9          | 34.0       | 36.3       | 35.9       | 41.2       | 37.1       | 40.7       | 34.9       |
| 11           | 45.1   | 47.8          | 43.7       | 45.5       | 47.2       | 45.7       | 45.8       | 45.5       | 45.7       |
| 12           | 72.1   | 70.7          | 71.0       | 70.7       | 70.8       | 70.5       | 68.5       | 71.0       | 70.9       |
| 13           | 22.7   | 20.0          | 24.3       | 24.1       | 21.5       | 24.8       | 21.5       | 24.5       | 24.3       |
| 14           | 20.3   | 18.6          | 16.5       | 24.1       | 22.4       | 24.9       | 22.8       | 17.4       | 25.4       |
| 15           | 59.0   | 59.0          | 62.3       | 60.2       | 61.6       | 63.0       | 59.9       | 62.9       | 63.1       |
| RMSD, ppm    |        | <b>1.71</b>   | 3.77       | 3.92       | 3.39       | 3.15       | 3.20       | 3.30       | 4.84       |
| max_dev, ppm |        | <b>3.2</b>    | 6.8        | 9.7        | 8.7        | 7.7        | 7.7        | 6.2        | 10.8       |
| <i>r</i>     |        | <b>0.9992</b> | 0.9950     | 0.9942     | 0.9967     | 0.9962     | 0.9963     | 0.9966     | 0.9916     |
| <i>n</i>     |        | 292           | 174        | 168        | 228        | 161        | 476        | 181        | 141        |

| Carbons      | Exper. | <b>15i</b> | <b>15j</b> | <b>15k</b> | <b>15l</b> | <b>15m</b> | <b>15n</b> | <b>15o</b> | <b>15p</b> |
|--------------|--------|------------|------------|------------|------------|------------|------------|------------|------------|
| 1            | 36.0   | 34.7       | 35.6       | 34.8       | 37.9       | 36.4       | 34.7       | 37.5       | 35.6       |
| 2            | 45.5   | 43.1       | 52.9       | 45.5       | 48.9       | 46.8       | 48.4       | 46.9       | 47.9       |
| 3            | 45.9   | 51.7       | 49.6       | 47.8       | 47.8       | 47.9       | 52.1       | 51.6       | 48.2       |
| 4            | 36.1   | 25.3       | 32.4       | 28.5       | 28.4       | 36.1       | 26.4       | 32.0       | 35.3       |
| 5            | 25.1   | 30.7       | 29.0       | 28.3       | 27.4       | 26.6       | 30.3       | 30.8       | 25.3       |
| 6            | 145.8  | 152.0      | 150.7      | 145.1      | 148.8      | 155.0      | 145.8      | 151.8      | 147.3      |
| 7            | 129.1  | 131.6      | 128.5      | 126.4      | 127.3      | 132.1      | 132.1      | 127.8      | 132.1      |
| 8            | 74.3   | 69.0       | 79.3       | 67.5       | 75.3       | 68.0       | 75.8       | 71.2       | 75.5       |
| 9            | 50.5   | 47.9       | 46.6       | 43.8       | 47.4       | 46.8       | 53.6       | 44.6       | 52.1       |
| 10           | 40.8   | 34.9       | 40.3       | 36.7       | 41.0       | 35.6       | 36.7       | 34.0       | 41.0       |
| 11           | 45.1   | 45.7       | 45.3       | 45.7       | 45.4       | 47.9       | 45.5       | 45.6       | 48.0       |
| 12           | 72.1   | 70.7       | 70.6       | 70.4       | 69.8       | 68.1       | 70.7       | 73.8       | 67.8       |
| 13           | 22.7   | 24.3       | 24.4       | 25.8       | 24.1       | 22.2       | 24.4       | 24.1       | 22.4       |
| 14           | 20.3   | 25.4       | 17.3       | 23.9       | 25.5       | 22.5       | 24.2       | 15.5       | 18.5       |
| 15           | 59.0   | 63.0       | 62.9       | 62.1       | 63.0       | 61.4       | 60.2       | 62.6       | 59.0       |
| RMSD, ppm    |        | 4.84       | 3.57       | 3.87       | 3.24       | 3.80       | 3.92       | 4.13       | 1.94       |
| max_dev, ppm |        | 10.8       | 7.4        | 7.6        | 7.7        | 9.2        | 9.7        | 6.8        | 4.3        |
| <i>r</i>     |        | 0.9916     | 0.9958     | 0.9945     | 0.9960     | 0.9956     | 0.9942     | 0.9939     | 0.9988     |
| <i>n</i>     |        | 141        | 162        | 127        | 467        | 267        | 162        | 162        | 265        |

<sup>a</sup> Prior to chemical shift analysis the conformational analysis of all molecules was carried out using Spartan'20 program [13] and MMFF force-field. Conformational ensembles were then energy optimized using DFT calculations at the B3LYP/6-31+G(d,p) level of theory and chemical shifts were computed at

the mPW1PW91/6-311+G(2d,p) level with the inclusion of SMD solvent model for chloroform. DFT calculations were carried out using Gaussian16 program [14].  $^1\text{H}$  and  $^{13}\text{C}$  NMR chemical shifts were determined from Boltzmann averaged isotropic values using the following scaling factors:  $^1\text{H}$  slope: -1.0936 and intercept: 31.8018;  $^{13}\text{C}$  slope: -1.0533 and intercept: 186.5242 [15]; RMSD – root-mean-square deviation; max\_dev – maximum deviation,  $r$  – correlation coefficient,  $n$  – number of conformations;

**Table S15.** Experimental [7] and DFT-calculated  $^{13}\text{C}$  NMR chemical shifts of the top six CASE-generated structures for palmarumycin B6<sup>a</sup>

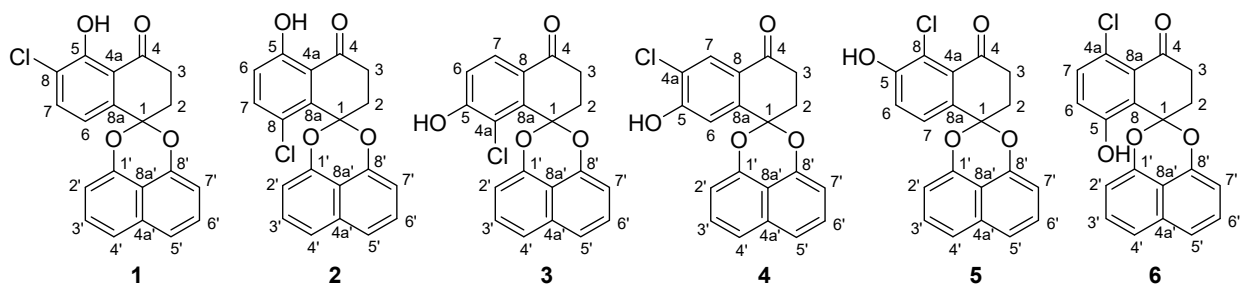

| Carbons                   | Exper. | 1             | 2      | 3      | 4      | 5      | 6      |
|---------------------------|--------|---------------|--------|--------|--------|--------|--------|
| C 1                       | 98.2   | 101           | 101.5  | 102.1  | 101.1  | 101.4  | 105.8  |
| C 2                       | 29.5   | 29.8          | 30.5   | 31     | 30.2   | 29.3   | 29     |
| C 3                       | 34.3   | 34.4          | 34.1   | 33.7   | 34     | 34.7   | 32.6   |
| C 4                       | 203.4  | 204.7         | 204.8  | 194.7  | 194.3  | 194.4  | 193.6  |
| C 4a                      | 116.3  | 116.6         | 117.2  | 117    | 118.6  | 117.4  | 124.6  |
| C 5                       | 158.1  | 160.3         | 162.4  | 156.8  | 155.8  | 153.7  | 154.8  |
| C 6                       | 117.2  | 116.3         | 120.1  | 116.8  | 114.7  | 119.7  | 122.7  |
| C 7                       | 137.1  | 137.8         | 140.7  | 130.4  | 131.3  | 127.8  | 135.3  |
| C 8                       | 124.2  | 122.8         | 122.9  | 126.2  | 125.3  | 129.2  | 124.1  |
| C 8a                      | 139.6  | 140.9         | 139    | 139.5  | 143.2  | 134.7  | 132.1  |
| C 1'                      | 147.3  | 148.4         | 148.1  | 148.1  | 148.5  | 148.8  | 147.3  |
| C 2'                      | 109.6  | 109.4         | 109.2  | 109.3  | 109.4  | 109.4  | 110.4  |
| C 3'                      | 127.7  | 128.5         | 128.4  | 128.4  | 128.4  | 128.5  | 128.6  |
| C 4'                      | 121.2  | 120.5         | 120.2  | 120.2  | 120.4  | 120.4  | 121.5  |
| C 4a'                     | 134.4  | 134.2         | 134.2  | 134.2  | 134.2  | 134.2  | 134.1  |
| C 5'                      | 121.2  | 120.5         | 120.2  | 120.2  | 120.4  | 120.4  | 121.5  |
| C 6'                      | 127.7  | 128.5         | 128.4  | 128.4  | 128.4  | 128.5  | 128.6  |
| C 7'                      | 109.6  | 109.4         | 109.2  | 109.3  | 109.4  | 109.4  | 110.4  |
| C 8'                      | 147.3  | 148.4         | 148.1  | 148.1  | 148.5  | 148.8  | 147.3  |
| C 8a'                     | 113.4  | 114.1         | 113.3  | 113.5  | 114.2  | 114.3  | 114.3  |
| RMSD, <sup>b</sup> ppm    |        | <b>1.11</b>   | 1.75   | 2.73   | 2.85   | 3.62   | 4.06   |
| max_dev, <sup>c</sup> ppm |        | <b>2.8</b>    | 4.3    | 8.7    | 9.1    | 9.3    | 9.8    |
| $r^d$                     |        | <b>0.9997</b> | 0.9991 | 0.9979 | 0.9974 | 0.9959 | 0.9944 |

<sup>a</sup> DFT computations were carried out at the  $\omega\text{B97-D}/6\text{-}31\text{G(d)}/\omega\text{B97-D}/6\text{-}31\text{G(d)}$  level of theory by Spartan'20 program [13]; <sup>b</sup> RMSD – root-mean-square deviation; <sup>c</sup> max\_dev – maximum deviation, <sup>d</sup>  $r$  – correlation coefficient.

**Table S16.** Experimental [8] and DFT-calculated  $^{13}\text{C}$  NMR chemical shifts for the top four CASE-generated structures and originally proposed structure for norcarbenzoxazole G<sup>a</sup>

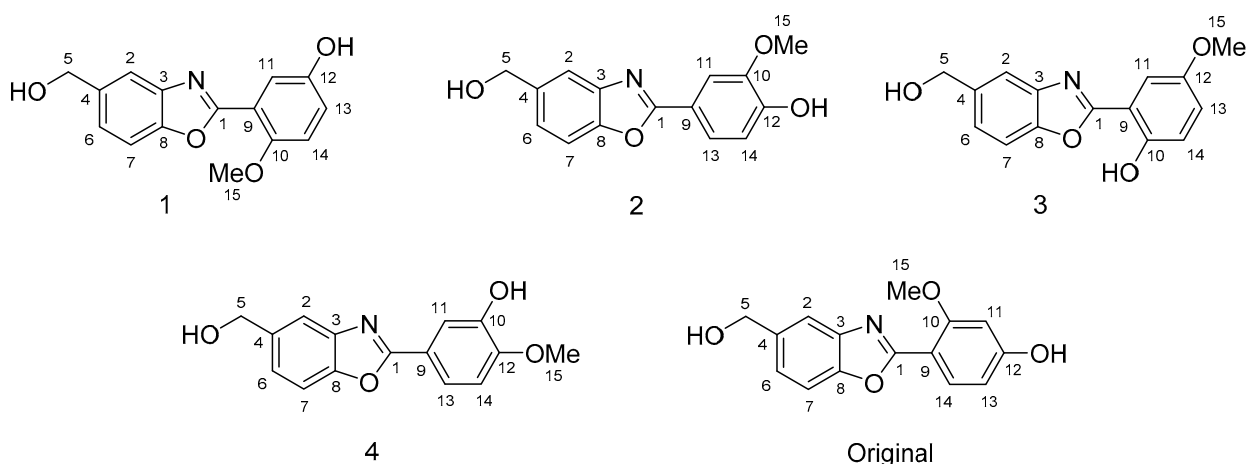

| Carbons                   | Exper. | <b>1</b> | <b>2</b>      | <b>3</b> | <b>4</b> | Original |
|---------------------------|--------|----------|---------------|----------|----------|----------|
| C 1                       | 165.7  | 164.3    | 164.3         | 164.3    | 164.3    | 164.9    |
| C 2                       | 118.5  | 121.8    | 121.6         | 121.7    | 121.7    | 121.2    |
| C 3                       | 143.2  | 142.0    | 143.3         | 142.0    | 143.3    | 142.4    |
| C 4                       | 140.2  | 137.0    | 136.8         | 137.0    | 136.9    | 136.7    |
| C 5                       | 65.2   | 66.6     | 66.6          | 66.6     | 54.9     | 66.7     |
| C 6                       | 125.4  | 127.7    | 127.7         | 127.8    | 127.7    | 126.8    |
| C 7                       | 111.4  | 110.8    | 110.5         | 110.9    | 110.4    | 110.5    |
| C 8                       | 151.3  | 151.4    | 151.0         | 151.4    | 150.8    | 151.1    |
| C 9                       | 119.3  | 115.5    | 119.2         | 112.8    | 120.0    | 108.2    |
| C 10                      | 149.7  | 153.3    | 146.9         | 150.8    | 146.8    | 161.3    |
| C 11                      | 111.7  | 116.2    | 109.5         | 110.9    | 113.1    | 98.1     |
| C 12                      | 152.2  | 150.0    | 150.4         | 153.4    | 150.3    | 161.8    |
| C 13                      | 122.9  | 120.7    | 122.0         | 123.6    | 120.9    | 106.7    |
| C 14                      | 117.0  | 113.3    | 114.1         | 118.6    | 110.3    | 134.4    |
| C 15                      | 56.7   | 54.3     | 54.7          | 54.2     | 66.7     | 54.4     |
| RMSD, <sup>b</sup> ppm    |        | 2.71     | <b>2.01</b>   | 2.39     | 4.46     | 8.69     |
| max_dev, <sup>c</sup> ppm |        | 4.5      | <b>3.4</b>    | 6.5      | 10.3     | 17.4     |
| $r^d$                     |        | 0.9958   | <b>0.9981</b> | 0.9968   | 0.9888   | 0.9600   |

<sup>a</sup> DFT calculations were carried out at the mPW1PW91/6-311+G(2d,p)//B3LYP/6-31+G(d,p) level of theory with the inclusion of PCM solvent model for methanol. DFT calculations were carried out using Gaussian16 program [14].  $^{13}\text{C}$  NMR chemical shifts were determined from the isotropic values using the following scaling factors: slope = -1.0399 and intercept = 186.5993 [15]; <sup>b</sup> RMSD – root-mean-square deviation; <sup>c</sup> max\_dev – maximum deviation, <sup>d</sup>  $r$  – correlation coefficient.

**Table S17.** Experimental [9] and DFT-calculated  $^{13}\text{C}$  NMR chemical shifts of the top three CASE-generated structures and originally proposed structure for hetiamacin A<sup>a</sup>

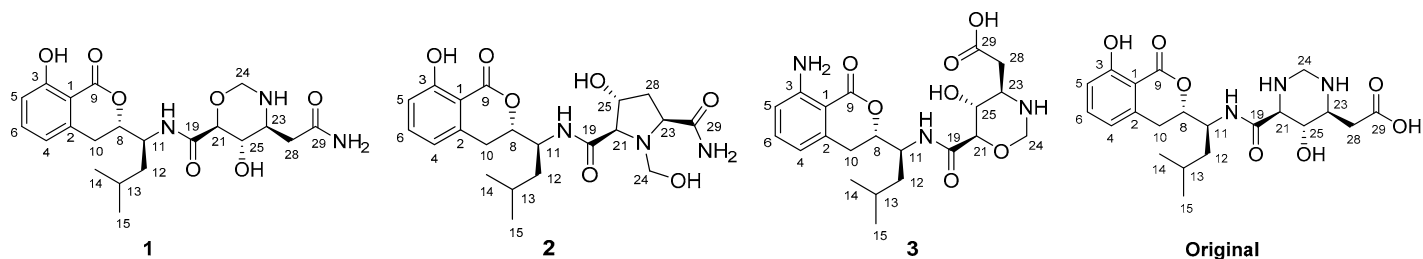

| Carbons                   | Exp   | 1             | 2      | 3      | Original |
|---------------------------|-------|---------------|--------|--------|----------|
| C 1                       | 109.2 | 108.1         | 107.6  | 104.6  | 107.8    |
| C2                        | 141.5 | 143           | 142.1  | 142.9  | 142.3    |
| C3                        | 163.2 | 163.4         | 163.4  | 152.3  | 163.3    |
| C4                        | 118.3 | 118           | 118.3  | 114    | 117.9    |
| C5                        | 116.5 | 115.2         | 115.8  | 114.2  | 115      |
| C6                        | 137.3 | 138.2         | 139    | 136.7  | 138.5    |
| C8                        | 82.6  | 81.8          | 82.5   | 81.3   | 80.1     |
| C9                        | 170.9 | 171.8         | 172    | 169.9  | 171.1    |
| C10                       | 30.7  | 30.8          | 31.2   | 32.7   | 30.2     |
| C11                       | 50.1  | 53.4          | 55.2   | 55.2   | 55.7     |
| C12                       | 40.6  | 40.9          | 40.1   | 41     | 41.2     |
| C13                       | 25.7  | 27.9          | 27.2   | 27.3   | 28       |
| C14                       | 21.8  | 21.7          | 20.5   | 22.4   | 20.2     |
| C15                       | 23.6  | 21.2          | 21.8   | 21     | 22.2     |
| C19                       | 172.8 | 174.1         | 177.6  | 175    | 174.2    |
| C21                       | 81.2  | 78.6          | 71.6   | 76     | 60.8     |
| C23                       | 58.8  | 57.5          | 65.8   | 54.4   | 57.4     |
| C24                       | 79.2  | 79.1          | 76.1   | 71.9   | 57       |
| C25                       | 70.3  | 68.5          | 77.8   | 65.6   | 69       |
| C28                       | 38    | 35.2          | 41.5   | 35.5   | 33.3     |
| C29                       | 176.6 | 175.1         | 180    | 176.5  | 176.5    |
| n <sup>b</sup>            |       | 83            | 127    | 125    | 78       |
| RMSD, <sup>c</sup> ppm    |       | <b>1.59</b>   | 3.75   | 4.04   | 6.87     |
| max_dev, <sup>d</sup> ppm |       | <b>3.3</b>    | 9.6    | 10.9   | 22.2     |
| r <sup>f</sup>            |       | <b>0.9996</b> | 0.9976 | 0.9977 | 0.9927   |

<sup>a</sup> Prior to chemical shift analysis the conformational analysis of all molecules was carried out using MacroModel program [16] and OPLS3e force-field. Conformational ensembles were then energy optimized using DFT calculations at the B3LYP/6-31+G(d,p) level of theory and chemical shifts were computed at the mPW1PW91/6-311+G(2d,p) level with the inclusion of PCM solvent model for methanol. DFT calculations were carried out using Gaussian16 program [14].  $^{13}\text{C}$  NMR chemical shifts were determined from Boltzmann averaged isotropic values using the following scaling factors: slope = -1.0399 and intercept = 186.5993 [15]; <sup>b</sup> n – number of conformations; <sup>c</sup> RMSD – root-mean-square deviation; <sup>d</sup> max\_dev – maximum deviation, <sup>f</sup> r – correlation coefficient.



**Table S18.** Summary of proposed and revised structures

| PROPOSED STRUCTURE                                                                                                                                                  | REVISED STRUCTURE                                                                                                                                                                     |
|---------------------------------------------------------------------------------------------------------------------------------------------------------------------|---------------------------------------------------------------------------------------------------------------------------------------------------------------------------------------|
| <p data-bbox="762 331 1018 365" style="text-align: center;">Macahydantoin B</p> 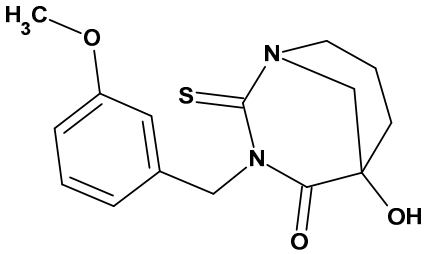   |                                                                                                     |
| <p data-bbox="783 627 959 660" style="text-align: center;">Clionastatin</p>        | <br><p data-bbox="997 920 1437 954" style="text-align: right;">Unambiguously confirmed by CASE</p> |
| <p data-bbox="783 963 959 996" style="text-align: center;">Pyrostatin B</p>       |                                                                                                   |
| <p data-bbox="762 1249 991 1283" style="text-align: center;">Madurastatin C</p>  |                                                                                                   |
| <p data-bbox="770 1451 935 1485" style="text-align: center;">Dichomitol</p>      |                                                                                                  |
| <p data-bbox="762 1787 991 1821" style="text-align: center;">Samoquasine A</p>   |                                                                                                  |

| PROPOSED STRUCTURE                                                                                                                                                   | REVISED STRUCTURE                                                                     |
|----------------------------------------------------------------------------------------------------------------------------------------------------------------------|---------------------------------------------------------------------------------------|
| <p data-bbox="751 241 999 275" style="text-align: center;">Palmarumicin B6</p> 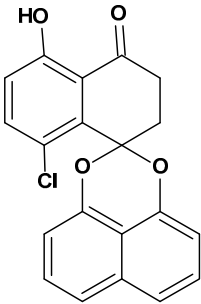     |    |
| <p data-bbox="738 624 1034 658" style="text-align: center;">Nocarbenzoxazole G</p>  |     |
| <p data-bbox="786 853 986 887" style="text-align: center;">Hetiamacin A</p>        |   |
| <p data-bbox="786 1140 970 1173" style="text-align: center;">Uniflorine A</p>     |  |
| <p data-bbox="767 1447 1002 1480" style="text-align: center;">Altechromone A</p>  |  |
| <p data-bbox="807 1756 962 1789" style="text-align: center;">Arunicin B</p>       |   |

## References

1. Yu, M.-Y.; Qin, X.-J.; Shao, L.-D.; Peng, X.-R.; Li, L.; Yang, H.; Qiu, M.-H., Corrigendum to “Macahydantoin A and B, two new thiohydantoin derivatives from Maca (*Lepidium meyenii*): Structural elucidation and concise synthesis of macahydantoin A” [Tetrahedron Lett., 58 (17) (2017) 1684–1686]. *Tetrahedron Lett.* **2018**, 59, (4), 418.
2. Fattorusso, E.; Taglialatela-Scafati, O.; Petrucci, F.; Bavestrello, G.; Calcinai, B.; Cerrano, C.; Di Meglio, P.; Ianaro, A., Polychlorinated Androstanes from the Burrowing Sponge *Cliona nigricans*. *Org. Lett.* **2004**, 6, (10), 1633-1635.
3. Aoyama, T.; Kojima, F.; Imada, C.; Muraoka, Y.; Naganawa, H.; Okami, Y.; Takeuchi, T.; Aoyagi, T., Pyrostatins A and B, New Inhibitors of N-Acetyl- $\beta$ -D-Glucosaminidase, Produced by *Streptomyces* sp. SA-3501. *Journal of Enzyme Inhibition* **1995**, 8, (4), 223-232.
4. Kawahara, T.; Itoh, M.; Izumikawa, M.; Sakata, N.; Tsuchida, T.; Shin-ya, K., Novel aziridine-containing peptides MBJ-0034 and MBJ-0035 from *Streptosporangium* sp. 32552. *J. Antibiot.* **2014**, 67, (8), 577-580.
5. Huang, Z.; Dan, Y.; Huang, Y.; Lin, L.; Li, T.; Ye, W.; Wei, X., Sesquiterpenes from the Mycelial Cultures of *Dichomitus squalens*. *J. Nat. Prod.* **2004**, 67, (12), 2121-2123.
6. Morita, H.; Sato, Y.; Chan, K.-L.; Choo, C.-Y.; Itokawa, H.; Takeya, K.; Kobayashi, J. i., Samoquasine A, a Benzoquinazoline Alkaloid from the Seeds of *Annona squamosa*. *J. Nat. Prod.* **2000**, 63, (12), 1707-1708.
7. Shan, T.; Tian, J.; Wang, X.; Mou, Y.; Mao, Z.; Lai, D.; Dai, J.; Peng, Y.; Zhou, L.; Wang, M., Bioactive Spirobisnaphthalenes from the Endophytic Fungus *Berkleasium* sp. *J. Nat. Prod.* **2014**, 77, (10), 2151-2160.
8. Sun, M.; Zhang, X.; Hao, H.; Li, W.; Lu, C., Nocarbenzoxazoles A–G, Benzoxazoles Produced by Halophilic *Nocardiopsis lucentensis* DSM 44048. *J. Nat. Prod.* **2015**, 78, (8), 2123-2127.
9. Wu, G.; Liu, S.; Wang, T.; Jiang, Z.; Lv, K.; Wang, Y.; Sun, C., Total Synthesis of Originally Proposed and Revised Structure of Hetiamacin A. *Org. Lett.* **2018**, 20, (12), 3566-3569.
10. Matsumura, T.; Kasai, M.; Hayashi, T.; Arisawa, M.; Momose, Y.; Arai, I.; Amagaya, S.; Komatsu, Y.,  $\alpha$ -glucosidase Inhibitors From Paraguayan Natural Medicine, Ñangapiry, The Leaves Of *Eugenia Uniflora*. *Pharm. Biol.* **2000**, 38, (4), 302-307.
11. Königs, P.; Rinker, B.; Maus, L.; Nieger, M.; Rheinheimer, J.; Waldvogel, S. R., Structural Revision and Synthesis of Altechromone A. *J. Nat. Prod.* **2010**, 73, (12), 2064-2066.
12. Jeong, S. Y.; Jun do, Y.; Kim, Y. H.; Min, B. S.; Min, B. K.; Woo, M. H., Monoterpenoids from the aerial parts of *Aruncus dioicus* var. *kamtschaticus* and their antioxidant and cytotoxic activities. *Bioorg. Med. Chem. Lett.* **2011**, 21, (11), 3252-3256.
1. Yu, M.-Y.; Qin, X.-J.; Shao, L.-D.; Peng, X.-R.; Li, L.; Yang, H.; Qiu, M.-H., Corrigendum to “Macahydantoin A and B, two new thiohydantoin derivatives from Maca (*Lepidium meyenii*): Structural elucidation and concise synthesis of macahydantoin A” [Tetrahedron Lett., 58 (17) (2017) 1684–1686]. *Tetrahedron Lett.* **2018**, 59, (4), 418.
13. *Spartan '20*, Wavefunction Inc., 18401 Von Karman Avenue, Suite 370 Irvine, CA 92612 U.S.A.
14. Frisch, M. J.; Trucks, G. W.; Schlegel, H. B.; Scuseria, G. E.; Robb, M. A.; Cheeseman, J. R.; Scalmani, G.; Barone, V.; Petersson, G. A.; Nakatsuji, H.; Li, X.; Caricato, M.; Marenich, A. V.; Bloino, J.; Janesko, B. G.; Gomperts, R.; Mennucci, B.; Hratchian, H. P.; Ortiz, J. V.; Izmaylov, A. F.; Sonnenberg, J. L.; Williams; Ding, F.; Lipparini, F.; Egidi, F.; Goings, J.; Peng, B.; Petrone, A.; Henderson, T.; Ranasinghe, D.; Zakrzewski, V. G.; Gao,

- J.; Rega, N.; Zheng, G.; Liang, W.; Hada, M.; Ehara, M.; Toyota, K.; Fukuda, R.; Hasegawa, J.; Ishida, M.; Nakajima, T.; Honda, Y.; Kitao, O.; Nakai, H.; Vreven, T.; Throssell, K.; Montgomery Jr., J. A.; Peralta, J. E.; Ogliaro, F.; Bearpark, M. J.; Heyd, J. J.; Brothers, E. N.; Kudin, K. N.; Staroverov, V. N.; Keith, T. A.; Kobayashi, R.; Normand, J.; Raghavachari, K.; Rendell, A. P.; Burant, J. C.; Iyengar, S. S.; Tomasi, J.; Cossi, M.; Millam, J. M.; Klene, M.; Adamo, C.; Cammi, R.; Ochterski, J. W.; Martin, R. L.; Morokuma, K.; Farkas, O.; Foresman, J. B.; Fox, D. J. *Gaussian 16* Rev. A.03, Wallingford, CT, 2016.
15. CHESHIRE. CHEmical SHift REpository with Coupling Constants Added Too. Available online: <http://cheshirenmr.info> (accessed on 30 March 2023).
  16. *Schrodinger* Release 2021-1: MacroModel; Schrodinger, LLC: New York, NY, 2021. <https://www.schrodinger.com/products/macromodel> (accessed March 30, 2023).
